# Supplementary material for: Oat Intake and Risk of Type 2 Diabetes, Cardiovascular Disease and All-Cause Mortality: A Systematic Review and Meta-Analysis
Source: MDPI journal article supplement (doi:10.3390/nu13082560), 2021-07-26
Supplement: s1 [file s1]

Supplementary Data

**Table S1.** Summary of the studies included in the systematic review.

**Table S2.** Extraction table for incidence of T2D.

**Table S3.** Extraction table for incidence of CVD.

A) Continuous exposure

B) Categorical exposure

**Table S4.** Extraction table for all-cause mortality.

**Table S5.** GRADE assessment. Does oat consumption influence the risk of T2D and CVD in the general population

## Supplementary Data

**Table S1.** Summary of the studies included in the systematic review.

| Author, year        | Funding                                 | Country      | Cohort name                      | Cohort size                                                | Mean/median age at entry                | % of males | Mean/median years of follow up | Baseline  | Finish | Study design | Outcome definition                                                                      | Dietary assessment method                                                            | Frequency of diet assessment | Control intervention | Number of events T2D | Number of events CV D                                 | Number of events all-cause mortality | Adjustments                                                                                       | Stratified analysis by sex, age, BMI / tested interaction with sex, age, BMI | Quality score |
|---------------------|-----------------------------------------|--------------|----------------------------------|------------------------------------------------------------|-----------------------------------------|------------|--------------------------------|-----------|--------|--------------|-----------------------------------------------------------------------------------------|--------------------------------------------------------------------------------------|------------------------------|----------------------|----------------------|-------------------------------------------------------|--------------------------------------|---------------------------------------------------------------------------------------------------|------------------------------------------------------------------------------|---------------|
| Johnsen et al, 2014 | Nordforsk and the Danish Cancer Society | Scandinavian | HELGA                            | 119 518 (w <sup>1</sup> : 801 01, m <sup>2</sup> :3 941 7) | W median (5-95th percentile) 51 (40-63) | 33         | NA                             | 1992-1998 | -      | prospective  | Vital status: National Central Population Registries, cause of death: National Cause of | semi-quantitative, country-specific and validated food-frequency questionnaire (FFQ) | baseline                     | -                    | 24 w, 70 m           | CHD <sup>3</sup> : 29 8 w, 85 8 m, stroke: 13 7 w, 14 | 783 9                                | age, follow-up time, education, smoking, alcohol intake, BMI <sup>4</sup> and total energy intake | -                                                                            | 7             |
|                     |                                         | Norway       | Norwegian Women and Cancer Study | 371 11 (w)                                                 |                                         | 0          | 11.1 median                    |           | 2009   |              |                                                                                         |                                                                                      |                              | -                    |                      |                                                       | 966                                  |                                                                                                   | -                                                                            |               |

## Supplementary Data

|                       |                                            |         |                                                   |                          |                                                            |      |             |           |      |             |                                                    |     |          |   |      |    |      |                                                                                                                                      |     |   |
|-----------------------|--------------------------------------------|---------|---------------------------------------------------|--------------------------|------------------------------------------------------------|------|-------------|-----------|------|-------------|----------------------------------------------------|-----|----------|---|------|----|------|--------------------------------------------------------------------------------------------------------------------------------------|-----|---|
|                       |                                            | Sweden  | Vaästербotten Intervention Programme cohort (VIP) | 25551 (w:13203, m:12348) | Median (5-95 percentile) 54(31-64)                         | 48.3 | 14.2 median |           | 2009 |             | Death Registries                                   |     |          | - |      | 3m | 1367 |                                                                                                                                      | NA  |   |
|                       |                                            | Denmark | Danish Diet Cancer and Health Study (DHC)         | 56865 (w:29787, m:27069) |                                                            | 47.6 | 11.9 median |           | 2008 |             |                                                    |     |          | - |      |    | 5506 |                                                                                                                                      | NA  |   |
| Lacopidan et al, 2015 | Nord Forsk (Centre of Excellence programme | Denmark | DCH                                               | 55060                    | W all cases 3269 median (5 - 95th percentiles ) 56 (50-64) | 47.4 | 15 median   | 1995-1997 | 2011 | prospective | T2D identified from the National Diabetes Registry | FFQ | baseline | - | 7366 | -  | -    | age, alcohol, smoking, education, participation in sports, intake of meat, total energy intake, waist circumference, body mass index | yes | 8 |

Supplementary Data

|                 |                                                   |         |     |       |                                                                                                                            |      |             |           |      |             |                                                                                                                                                         |                              |          |   |   |      |   |                                                                                                                                                                                                                                                                                  |     |   |
|-----------------|---------------------------------------------------|---------|-----|-------|----------------------------------------------------------------------------------------------------------------------------|------|-------------|-----------|------|-------------|---------------------------------------------------------------------------------------------------------------------------------------------------------|------------------------------|----------|---|---|------|---|----------------------------------------------------------------------------------------------------------------------------------------------------------------------------------------------------------------------------------------------------------------------------------|-----|---|
|                 | HELGA, the Danish Cancer Society.                 |         |     |       | M all cases 4097 n all cases 1570 median (5-95th percentiles) 55 (50-64)                                                   |      |             |           |      |             |                                                                                                                                                         |                              |          |   |   |      |   |                                                                                                                                                                                                                                                                                  |     |   |
| Helnes et, 2016 | Danish Cancer Society and Innovation Fund Denmark | Denmark | DHC | 54871 | all 25921 M median (5-95th percentiles) 55.0 (50.0-64.0)<br>M cases 1676 median age 57.0( 51.0-64.0)<br>all 28950 W median | 47.2 | 13.6 median | 1993-1997 | 2009 | prospective | fatal MI <sup>5</sup> and nonfatal MI, (codes 410.0–410.99 and I21.0–I21.9) of the International Classification of Diseases (ICD). sudden cardiac death | FFQ and 24-h dietary recalls | baseline | - | - | 2329 | - | School level, smoking, alcohol intake, participation in sports, w: menopausal status, hormone replacement therapy, intakes of fruit, vegetables, fish, red and processed meat, BMI, waist circumference, systolic blood pressure, self-reported hypertension, serum cholesterol, | yes | 8 |

## Supplementary Data

|                              |                                                                                                                      |             |          |           |                                                                             |          |                    |                                     |      |                     |                                                                                                                                                                     |                                  |                              |   |   |                            |   |                                                                                                                                                                                                                                           |     |   |
|------------------------------|----------------------------------------------------------------------------------------------------------------------|-------------|----------|-----------|-----------------------------------------------------------------------------|----------|--------------------|-------------------------------------|------|---------------------|---------------------------------------------------------------------------------------------------------------------------------------------------------------------|----------------------------------|------------------------------|---|---|----------------------------|---|-------------------------------------------------------------------------------------------------------------------------------------------------------------------------------------------------------------------------------------------|-----|---|
|                              |                                                                                                                      |             |          |           | n age<br>56.0(<br>50.0-<br>64.0)                                            |          |                    |                                     |      |                     | diagno<br>sis<br>(ICD<br>8:<br>427.27;<br>or ICD<br>10:<br>I46.0-<br>I46.9).                                                                                        |                                  |                              |   |   |                            |   | hypercholester<br>olemia                                                                                                                                                                                                                  |     |   |
|                              |                                                                                                                      |             |          |           | cases<br>W<br>653<br>media<br>n age<br>59.0(<br>51.0-<br>64.0)              |          |                    |                                     |      |                     |                                                                                                                                                                     |                                  |                              |   |   |                            |   |                                                                                                                                                                                                                                           |     |   |
| Hans<br>en et<br>al,<br>2017 | Dani<br>sh<br>Cou<br>ncil<br>for<br>Strat<br>egic<br>Rese<br>arch,<br>The<br>Dani<br>sh<br>Canc<br>er<br>Soci<br>ety | Den<br>mark | DHC      | 553<br>38 | all<br>media<br>n (5-<br>95th<br>perce<br>ntile)<br>56.1(<br>50.7-<br>64.2) | 47<br>.6 | media<br>n<br>13.5 | 12.<br>199<br>3-<br>05.<br>199<br>7 | 2009 | pros<br>pecti<br>ve | Stroke:<br>rapid<br>onset<br>disturb<br>ance of<br>focal<br>or<br>global<br>cerebra<br>l<br>functio<br>n<br>lasting<br>>24<br>hours<br>or<br>leading<br>to<br>death | FFQ                              | base<br>line                 | - | - | 22<br>83                   | - | Age, total<br>energy intake,<br>alcohol intake,<br>physical<br>activity,<br>smoking and<br>education,<br>BMI-adjusted<br>waist<br>circumference,<br>atrial<br>fibrillation,<br>hypertension,<br>hypercholester<br>olemia and<br>diabetes. | yes | 8 |
| Juan<br>et al,<br>2017       | Nati<br>onal<br>Canc<br>er<br>Instit                                                                                 | US          | HPF<br>S | 428<br>23 | mean<br>(SD)<br>53.2(<br>9.5)                                               | 10<br>0  | 24                 | 198<br>6                            | 2010 | pros<br>pecti<br>ve | Nation<br>al<br>Survey<br>of<br>Stroke,                                                                                                                             | Semi-<br>quantit<br>ative<br>FFQ | Base<br>line;<br>ever<br>y 4 | - | - | 90<br>8<br>str<br>oke<br>s | - | Age, BMI,<br>smoking status,<br>alcohol intake,<br>physical<br>activity, family                                                                                                                                                           | -   | 7 |

Supplementary Data

|                                                                                                                                                           |  |     |           |                               |   |    |          |      |                     |                                                                                                                                                         |  |           |  |  |  |                             |  |                                                                                                                                                                                                                                                                                            |   |  |
|-----------------------------------------------------------------------------------------------------------------------------------------------------------|--|-----|-----------|-------------------------------|---|----|----------|------|---------------------|---------------------------------------------------------------------------------------------------------------------------------------------------------|--|-----------|--|--|--|-----------------------------|--|--------------------------------------------------------------------------------------------------------------------------------------------------------------------------------------------------------------------------------------------------------------------------------------------|---|--|
| ute,<br>Nati<br>onal<br>Hear<br>t,<br>Lung<br>and<br>Bloo<br>d<br>Insti<br>tute<br>and<br>Nati<br>onal<br>Insti<br>tutes<br>of<br>Heal<br>th<br>(NIH<br>) |  | NHS | 717<br>50 | mean<br>(SD)<br>50.1(<br>7.1) | 0 | 26 | 198<br>4 | 2010 | pros<br>pecti<br>ve | certific<br>ates,<br>hospi<br>tal<br>records<br>,<br>autops<br>y<br>records<br>,<br>telepho<br>ne<br>intervi<br>ew/<br>letter<br>corresp<br>ondenc<br>e |  | year<br>s |  |  |  | 15<br>50<br>str<br>oke<br>s |  | history of<br>diabetes,<br>cancer and<br>heart disease,<br>multivitamin<br>use,<br>hypertension,<br>high<br>cholesterol at<br>baseline, total<br>energy intake,<br>modified<br>alternative<br>health eating<br>index score. W:<br>menopausal<br>status,<br>postmenopausa<br>l hormone use. | - |  |
|-----------------------------------------------------------------------------------------------------------------------------------------------------------|--|-----|-----------|-------------------------------|---|----|----------|------|---------------------|---------------------------------------------------------------------------------------------------------------------------------------------------------|--|-----------|--|--|--|-----------------------------|--|--------------------------------------------------------------------------------------------------------------------------------------------------------------------------------------------------------------------------------------------------------------------------------------------|---|--|

Supplementary Data

|                        |                                                                                                                                                                                                             |             |     |           |       |          |    |          |      |                     |                  |     |              |   |          |   |   |                                                                                                                                                                                                                                               |   |   |
|------------------------|-------------------------------------------------------------------------------------------------------------------------------------------------------------------------------------------------------------|-------------|-----|-----------|-------|----------|----|----------|------|---------------------|------------------|-----|--------------|---|----------|---|---|-----------------------------------------------------------------------------------------------------------------------------------------------------------------------------------------------------------------------------------------------|---|---|
| Kyro<br>et al,<br>2018 | Swe<br>dish<br>Rese<br>arch<br>Cou<br>ncil–<br>You<br>ng<br>Rese<br>arch<br>Inve<br>stiga<br>tor<br>Gran<br>t, the<br>Dani<br>sh<br>Canc<br>er<br>Soci<br>ety,<br>Inno<br>vatio<br>n<br>Fund<br>Den<br>mark | Den<br>mark | DHC | 554<br>65 | 50-65 | 47<br>.3 | 15 | 199<br>5 | 2011 | pros<br>pecti<br>ve | inciden<br>t T2D | FFQ | base<br>line | - | 74<br>17 | - | - | Age,<br>educational<br>level<br>completed,<br>Cambridge<br>Physical<br>Activity Index,<br>smoking status,<br>alcohol intake,<br>intake of red<br>and processed<br>meat. W:<br>menopausal<br>status; use of<br>menopausal<br>hormone<br>herapy | - | 9 |
|------------------------|-------------------------------------------------------------------------------------------------------------------------------------------------------------------------------------------------------------|-------------|-----|-----------|-------|----------|----|----------|------|---------------------|------------------|-----|--------------|---|----------|---|---|-----------------------------------------------------------------------------------------------------------------------------------------------------------------------------------------------------------------------------------------------|---|---|

Supplementary Data

|                |                                         |           |                        |        |                                           |      |                    |           |           |              |                                                                                                                                                                    |                 |                                 |                |      |                          |   |                                                                                                                     |                          |   |
|----------------|-----------------------------------------|-----------|------------------------|--------|-------------------------------------------|------|--------------------|-----------|-----------|--------------|--------------------------------------------------------------------------------------------------------------------------------------------------------------------|-----------------|---------------------------------|----------------|------|--------------------------|---|---------------------------------------------------------------------------------------------------------------------|--------------------------|---|
| Wu et al, 2019 | Academia Sinica                         | Taiwan    | The Biosignature study | 1663   | no oat: 65.26 ±12.19<br>oat: 68.82 ±11.65 | 36.6 | 26.75 ±8.11 months | -         | -         | prospective  | major cardiovascular events: cardiovascular death, non-fatal MI, non-fatal stroke, revascularization procedures including coronary intervention and bypass surgery | questionnaire   | baseline                        | not eating oat | -    | 175                      | - | Age, gender, hypertension, diabetes, smoking, ratio of waist to hip, medication, lipid, HsCRP, TNF- $\alpha$ .      | -                        | 6 |
| Xu et al, 2019 | University of Technology Sydney Faculty | Australia | 45 and Up Study        | 142503 | 45-64y 37,626 all cases<br>65-80y 24,203  | -    | 6                  | 2006-2009 | 2012-2015 | longitudinal | heart disease, stroke, diabetes as response to "has a                                                                                                              | brief questions | twice: baseline + 5 years later | -              | 5283 | Heart disease 14148, str | - | Gender, marital status, education level, SEIFA, alcohol drinking, smoking and physical activity levels, BMI and for | stratified by age groups | 5 |



Supplementary Data

|                                |                                                                                                                                                                                                |             |     |           |                                                 |          |                    |                                     |                    |                     |                                                                                                |                     |              |                      |   |                 |   |                                                                                                                                                  |           |   |
|--------------------------------|------------------------------------------------------------------------------------------------------------------------------------------------------------------------------------------------|-------------|-----|-----------|-------------------------------------------------|----------|--------------------|-------------------------------------|--------------------|---------------------|------------------------------------------------------------------------------------------------|---------------------|--------------|----------------------|---|-----------------|---|--------------------------------------------------------------------------------------------------------------------------------------------------|-----------|---|
|                                | lty of<br>Heal<br>th<br>seed<br>fundi<br>ng,<br>the<br>Hear<br>t<br>Foun<br>datio<br>n,<br>New<br>Sout<br>h<br>Wale<br>s<br>offic<br>e for<br>Heal<br>th<br>and<br>Medi<br>cal<br>Rese<br>arch |             |     |           | all<br>cases<br><br>>80 y<br>5967               |          |                    |                                     |                    |                     | doctor<br>ever<br>told<br>you<br>that<br>you<br>have”                                          |                     |              |                      |   | oke<br>29<br>11 |   | fruit, vegetable,<br>red and<br>processed meat<br>consumption.                                                                                   |           |   |
| Lysk<br>jaer<br>et al,<br>2020 | NA                                                                                                                                                                                             | Den<br>mark | DHC | 550<br>95 | medi<br>n (5-<br>95)<br>56.1(<br>52.7–<br>60.3) | 47<br>.6 | 13.4<br>media<br>n | 12.<br>199<br>3-<br>05.<br>199<br>7 | 30.1<br>1.20<br>09 | pros<br>pecti<br>ve | Nonfat<br>al and<br>fatal<br>stroke:<br>linkage<br>to the<br>Danish<br>Nation<br>al<br>Patient | 192-<br>item<br>FFQ | base<br>line | eggs,<br>yogh<br>urt | - | 22<br>60        | - | Total energy<br>intake, sex,<br>alcohol,<br>physical<br>activity,<br>smoking,educat<br>ion level, BMI,<br>mAHEI score,<br>history of<br>diabetes | by<br>age | 8 |

Supplementary Data

|                  |     |    |     |       |       |   |    |      |      |             | Register.                 |     |         |   |      |   |   | mellitus, hypercholesterolemia, hypertension.                                                                                                                                                          |   |   |
|------------------|-----|----|-----|-------|-------|---|----|------|------|-------------|---------------------------|-----|---------|---|------|---|---|--------------------------------------------------------------------------------------------------------------------------------------------------------------------------------------------------------|---|---|
| Liu et al., 2000 | NIH | US | NHS | 75521 | 38-63 | 0 | 10 | 1984 | 1984 | prospective | confirmed type 2 diabetes | FFQ | 4 years | - | 1879 | - | - | Age, body mass index; physical activity; cigarette smoking, alcohol intake; family history of diabetes in a first-degree relative; use of multivitamins or vitamin E supplements; total energy intake. | - | 7 |

## Supplementary Data

|                              |                                                                            |             |     |           |       |          |    |          |              |                     |                                                                  |     |                |   |   |         |          |                                                                                                                                                                                                                                                                                                                           |   |   |
|------------------------------|----------------------------------------------------------------------------|-------------|-----|-----------|-------|----------|----|----------|--------------|---------------------|------------------------------------------------------------------|-----|----------------|---|---|---------|----------|---------------------------------------------------------------------------------------------------------------------------------------------------------------------------------------------------------------------------------------------------------------------------------------------------------------------------|---|---|
| Olse<br>n et<br>al.,<br>2011 | The<br>Dani<br>sh<br>Canc<br>er<br>Soci<br>ety<br>and<br>Nord<br>Fors<br>k | Den<br>mark | DHC | 570<br>53 | 50-64 | 46<br>.3 | 12 | 199<br>7 | 2009         | pros<br>pecti<br>ve | All-<br>cause<br>mortali<br>ty                                   | FFQ | -              | - | - | -       | 412<br>6 | Age, time<br>under study,<br>smoking status,<br>smoking<br>duration,<br>current tobacco<br>consumption,<br>time since<br>cessation,<br>alcohol intake,<br>school<br>education,<br>participation in<br>sports, time<br>spent on sports<br>per week, BMI,<br>intake of red<br>and processed<br>meat, total<br>energy intake | - | 9 |
| Liu<br>et<br>al.,<br>1999    | NIH                                                                        | US          | NHS | 755<br>21 | 38-63 | 0        | 10 | 198<br>4 | 1.6.1<br>994 | pros<br>pecti<br>ve | inciden<br>t CHD<br>(fatal<br>CHD,<br>any<br>non<br>fatal<br>MI) | FFQ | 4<br>year<br>s | - | - | 76<br>1 | -        | Age, body<br>mass index,<br>cigarette<br>smoking,<br>alcohol intake,<br>parental or<br>family history<br>of MI before<br>the age of 60 y,<br>self-reported<br>history of<br>hypertension or<br>hypercholestor<br>emia,<br>menopausal<br>status , protein<br>intake, aspirin                                               | - | 8 |

## Supplementary Data

|                   |                    |    |        |       |       |     |         |      |          |             |                                                                             |                      |               |   |       |     |     |                                                                                                                                                                                                                            |                                                                    |   |
|-------------------|--------------------|----|--------|-------|-------|-----|---------|------|----------|-------------|-----------------------------------------------------------------------------|----------------------|---------------|---|-------|-----|-----|----------------------------------------------------------------------------------------------------------------------------------------------------------------------------------------------------------------------------|--------------------------------------------------------------------|---|
|                   |                    |    |        |       |       |     |         |      |          |             |                                                                             |                      |               |   |       |     |     | use, use of multiple vitamin or vitamin E supplements, vigorous activity, total energy intake, for fats, dietary fibers, folate, vitamin B-6, and vitamin E                                                                |                                                                    |   |
| Wolk et al., 1999 | NIH, Bethesda, Md. | US | NHS    | 68782 | 37-64 | 0   | 10      | 1984 | 1.6.1994 | prospective | CHD (symptomatic nonfatal MI or fatal CHD)                                  | FFQ                  | every 2 years | - | -     | 591 | 162 | standard CHD risk factors                                                                                                                                                                                                  | -                                                                  | 8 |
| Hu et al., 2020   | NIH                | US | NHS    | 69139 | 38-63 | 0   | mean 24 | 1984 | 2014     | prospective | T2D, confirmed by at least one criteria of the National Diabetes Data Group | semiquantitative FFQ | 2 years       | - | 18629 | -   | -   | Age, ethnicity, smoking, alcohol intake, multivitamin use, physical activity, modified alternative healthy eating index, total energy, family history of diabetes, postmenopausal hormone use, oral contraceptive use, BMI | BMI, physical activity, smoking status, family history of diabetes | 7 |
|                   |                    |    | NHS II | 89120 | 27-42 | 0   |         | 1991 | 2017     | prospective |                                                                             |                      |               |   |       |     |     |                                                                                                                                                                                                                            |                                                                    |   |
|                   |                    |    | HPFS   | 36525 | 40-75 | 100 |         | 1986 | 2016     | prospective |                                                                             |                      |               |   |       |     |     |                                                                                                                                                                                                                            |                                                                    |   |

## Supplementary Data

<sup>1</sup> – women<sup>2</sup> – men<sup>3</sup> – coronary heart disease<sup>4</sup> - Body Mass Index<sup>5</sup> - myocardial infarction**Table S2.** Extraction table for incidence of T2D.

| Author, year     | Outcome definition | Cohort | Total number of events | Category Exposure |       |                                          |                     |              |        |                    |        |                        |           | Stratified by age |
|------------------|--------------------|--------|------------------------|-------------------|-------|------------------------------------------|---------------------|--------------|--------|--------------------|--------|------------------------|-----------|-------------------|
|                  |                    |        |                        | by group          | cases | Total intake median, (5-95th percentile) | Total intake +/- SD | Not-adjusted |        | Age-adjusted model |        | Multivariable analysis |           |                   |
|                  |                    |        |                        |                   |       |                                          |                     | RR           | 95% CI | RR                 | 95% CI | RR                     | 95% CI    |                   |
| Kyro et al, 2018 | incident T2D       | DHC    | 7417                   | m: Oat q1         | 1185  | 0 g/d                                    | -                   | -            | -      | -                  | -      | 1                      |           | -                 |
|                  |                    |        |                        | m: Oat q4         | 777   | >13 g/d                                  | -                   | -            | -      | -                  | -      | 0.8                    | 0,72-0,89 |                   |
|                  |                    |        |                        | m: oatmealq1      | 2100  | 0 g/d                                    | -                   | -            | -      | -                  | -      | 1                      |           |                   |
|                  |                    |        |                        | m: oatmealq4      | 686   | >21 g/d                                  | -                   | -            | -      | -                  | -      | 0.73                   | 0,67-0,80 |                   |
|                  |                    |        |                        | w: Oat q1         | 1099  | 0 g/d                                    | -                   | -            | -      | -                  | -      | 1                      |           |                   |
|                  |                    |        |                        | w: Oat q4         | 695   | >13 g/d                                  | -                   | -            | -      | -                  | -      | 0.92                   | 0,82-1,02 |                   |
|                  |                    |        |                        | w: oatmealq1      | 1506  | 0 g/d                                    | -                   | -            | -      | -                  | -      | 1                      |           |                   |
|                  |                    |        |                        | w: oatmealq4      | 446   | >21 g/d                                  | -                   | -            | -      | -                  | -      | 0.79                   | 0,71-0,88 |                   |
| Li et al., 2000  | confirmed T2D      | NHS    | 1879                   | Almost Never      | -     | -                                        | -                   | -            | -      | 1                  |        |                        | -         | -                 |
|                  |                    |        |                        | <40g/wk           | -     | -                                        | -                   | -            | -      | 0.97               | 0.88   | 1.07                   | -         |                   |
|                  |                    |        |                        | 80-160/wk         | -     | -                                        | -                   | -            | -      | 0.84               | 0.69   | 1.03                   | -         |                   |
|                  |                    |        |                        | 200–300/wk        | -     | -                                        | -                   | -            | -      | 0.61               | 0.32   | 1.15                   | -         |                   |
|                  |                    |        |                        | ≥40g/d            | -     | -                                        | -                   | -            | -      | 0.73               | 0.35   | 1.54                   | -         |                   |

## Supplementary Data

|                  |                                                                                |                 |      |               |      |          |   |      |           |   |   |      |           |     |
|------------------|--------------------------------------------------------------------------------|-----------------|------|---------------|------|----------|---|------|-----------|---|---|------|-----------|-----|
| X et al, 2019    | diabetes in response to the question 'has a doctor ever told you that you have | 45 and Up Study | 5283 | 45-65 y       | -    | >0       | - | 0.72 | 0.65-0.76 | - | - | 0.85 | 0.76-0.92 | yes |
|                  |                                                                                |                 |      | 65-80         | -    | >0       | - | 0.73 | 0.68-0.79 | - | - | 0.86 | 0.79-0.92 |     |
|                  |                                                                                |                 |      | >80y          | -    | >0       | - | 0.78 | 0.69-0.85 | - | - | 0.86 | 0.74-0.98 |     |
| Kyro et al, 2018 | incident T2D                                                                   | DCH             | 7417 | m: Oat q1     | 1185 | 0 g/d    | - | -    | -         | - | - | 1    |           | -   |
|                  |                                                                                |                 |      | m: Oat q2     | 1107 | 0-1 g/d  | - | -    | -         | - | - | 0.93 | 0,86-1,01 |     |
|                  |                                                                                |                 |      | m: Oat q3     | 1047 | 1-13 g/d | - | -    | -         | - | - | 0.94 | 0,87-1,03 |     |
|                  |                                                                                |                 |      | m: Oat q4     | 777  | >13 g/d  | - | -    | -         | - | - | 0.8  | 0,72-0,89 |     |
|                  |                                                                                |                 |      | m: oatmeal q1 | 2100 | 0 g/d    | - | -    | -         | - | - | 1    |           |     |
|                  |                                                                                |                 |      | m: oatmeal q2 | 385  | 0-1 g/d  | - | -    | -         | - | - | 0.99 | 0,89-1,10 |     |
|                  |                                                                                |                 |      | m: oatmeal q3 | 945  | 1-21 g/d | - | -    | -         | - | - | 0.99 | 0,92-1,07 |     |
|                  |                                                                                |                 |      | m: oatmeal q4 | 686  | >21 g/d  | - | -    | -         | - | - | 0.73 | 0,67-0,80 |     |
|                  |                                                                                |                 |      | w: Oat q1     | 1099 | 0 g/d    | - | -    | -         | - | - | 1    |           |     |
|                  |                                                                                |                 |      | w: Oat q2     | 687  | 0-1 g/d  | - | -    | -         | - | - | 1.02 | 0,92-1,02 |     |
|                  |                                                                                |                 |      | w: Oat q3     | 820  | 1-13 g/d | - | -    | -         | - | - | 1.04 | 0,94-1,14 |     |
|                  |                                                                                |                 |      | w: Oat q4     | 695  | >13 g/d  | - | -    | -         | - | - | 0.92 | 0,82-1,02 |     |
|                  |                                                                                |                 |      | w: oatmeal q1 | 1506 | 0 g/d    | - | -    | -         | - | - | 1    |           |     |

## Supplementary Data

|                        |                 |           |       |                 |      |                                |   |   |   |   |   |      |           |     |
|------------------------|-----------------|-----------|-------|-----------------|------|--------------------------------|---|---|---|---|---|------|-----------|-----|
|                        |                 |           |       | w:<br>oatmealq2 | 394  | 0-1 g/d                        | - | - | - | - | - | 1.05 | 0,94-1,18 |     |
|                        |                 |           |       | w:<br>oatmealq3 | 955  | 1-21 g/d                       | - | - | - | - | - | 1.06 | 0,98-1,15 |     |
|                        |                 |           |       | w:<br>oatmealq4 | 446  | >21 g/d                        | - | - | - | - | - | 0.79 | 0,71-0,88 |     |
| Hu, et<br>al.,<br>2020 | incident<br>T2D | NHS       | 18629 | w               | 9723 | never or<br><40g/month         | - | - | - | - | - | 1    | Ref       | yes |
|                        |                 | NHS<br>II |       | w               | 6821 | 40g/month-<br>40g/week         |   |   |   |   |   | 0.95 | 0.92-0.98 |     |
|                        |                 | HPFS      |       | m               | 2085 | 40g/week-<br>160-<br>240g/week |   |   |   |   |   | 0.79 | 0.75-0.83 |     |
|                        |                 | NHS       |       |                 | 4555 | never or<br><40g/month         |   |   |   |   |   | 1    | Ref       |     |
|                        |                 |           |       |                 | 2847 | 40g/month-<br>40g/week         |   |   |   |   |   | 0.93 | 0.89-0.98 |     |
|                        |                 |           |       |                 | 768  | 40g/week-<br>160-<br>240g/week |   |   |   |   |   | 0.79 | 0.73-0.85 |     |
|                        |                 | NHS<br>II |       |                 | 3166 | never or<br><40g/month         |   |   |   |   |   | 1    | Ref       |     |
|                        |                 |           |       |                 | 2961 | 40g/month-<br>40g/week         |   |   |   |   |   | 1    | 0.95-1.05 |     |
|                        |                 |           |       |                 | 945  | 40g/week-<br>160-<br>240g/week |   |   |   |   |   | 0.83 | 0.77-0.89 |     |
|                        |                 | HPFS      |       |                 | 2002 | never or<br><40g/month         |   |   |   |   |   | 1    | Ref       |     |
|                        |                 |           |       |                 | 1013 | 40g/month-<br>40g/week         |   |   |   |   |   | 0.89 | 0.83-0.96 |     |

## Supplementary Data

|  |  |  |  |  |     |                        |  |  |  |  |  |      |           |  |
|--|--|--|--|--|-----|------------------------|--|--|--|--|--|------|-----------|--|
|  |  |  |  |  | 372 | 40g/week-160-240g/week |  |  |  |  |  | 0.71 | 0.63-0.79 |  |
|--|--|--|--|--|-----|------------------------|--|--|--|--|--|------|-----------|--|

**Table S3.** Extraction table for incidence of CVD.

## A) Continuous exposure

| Author, year        | Outcome definition | Cohort | Total number of events | groups | cases      | Total intake                                      | Total intake +/- SD | continuous assessment | comparison | Not-adjusted |        | Age-adjusted model |             | Multivariable analysis |             | Stratified by age |
|---------------------|--------------------|--------|------------------------|--------|------------|---------------------------------------------------|---------------------|-----------------------|------------|--------------|--------|--------------------|-------------|------------------------|-------------|-------------------|
|                     |                    |        |                        |        |            |                                                   |                     |                       |            | RR           | 95% CI | RR                 | 95% CI      | RR                     | 95% CI      |                   |
| Juan et al, 2017    | stroke             | HPFS   | 908                    | -      | -          | 40g/week                                          | -                   | 1 serving/week        | -          | -            | -      | 0.79               | 0.57 - 1.09 | 0.93                   | 0.67 - 1.28 | -                 |
|                     |                    | NHS    | 1550                   | -      | -          | 40g/week                                          | -                   |                       | -          | -            | -      | 0.87               | 0.65 - 1.15 | 1.05                   | 0.8 - 1.37  |                   |
| Helnaes et al, 2016 | MI                 | DHC    | 2329                   | m      | all 25921  | oatmeal median (5- 95th percentile) 0.8(0.0-50.0) | 13.1+/- 20.1        |                       | -          | -            | -      | -                  | -           | -                      | -           | -                 |
|                     |                    |        |                        |        |            | oats 1.0 (0.0-30.5)                               | 8.3+/- 12.4         |                       | -          | -            | -      | -                  | -           | -                      | -           | -                 |
|                     |                    |        |                        |        | cases 1676 | oatmeal 0.0(10.5-50.0)                            | 10.5+/- 18.5        |                       | -          | -            | -      | 0.81(per 25g       | 0.75 - 0.88 | 0.89 (per 25g          | 0.82 - 0.96 | -                 |



## Supplementary Data

|                            |                  |       |      |   |                  |                              |                               |       |   |   |   |                                                                 |                   |                                      |                   |   |
|----------------------------|------------------|-------|------|---|------------------|------------------------------|-------------------------------|-------|---|---|---|-----------------------------------------------------------------|-------------------|--------------------------------------|-------------------|---|
|                            |                  |       |      |   |                  |                              |                               |       |   |   |   | increase<br>)                                                   |                   | increas<br>e)                        |                   |   |
|                            |                  |       |      |   |                  | oats 0.7<br>(0.0-<br>30.5)   | 6.8+/-<br>11.5                |       | - | - | - | 0.89<br>(per<br>10g<br>increase<br>)                            | 0.85<br>-<br>0.93 | 0.96<br>(per<br>10g<br>increas<br>e) | 0.91<br>-<br>1.00 | - |
|                            |                  |       |      | w | all<br>2895<br>0 | oatmeal<br>0,8(0.0-<br>50.0) | 11.5+/-<br>18.6               |       | - | - | - | -                                                               | -                 | -                                    | -                 | - |
|                            |                  |       |      |   |                  | oats 1.1<br>(0.0-<br>30.5)   | 7.5+/-<br>11.6                |       | - | - | - | -                                                               | -                 | -                                    | -                 | - |
|                            |                  |       |      |   | cases<br>653     | oatmeal<br>0.0(0.0-<br>50.0) | 8.5+/-<br>16.6                |       | - | - | - | 0.82<br>(per<br>25g<br>increase<br>)                            | 0.71<br>-<br>0.95 | 0.92<br>(per<br>25g<br>increas<br>e) | 0.8-<br>1.05      | - |
|                            |                  |       |      |   |                  | oats<br>0.7(0.0-<br>30.3)    | 5.7+/-<br>10.3                |       | - | - | - | 0.85<br>(per<br>10g<br>increase<br>)                            | 0.78<br>-<br>0.92 | 0.96<br>(per<br>10g<br>increas<br>e) | 0.88<br>-<br>1.05 | - |
| Johnse<br>n et al,<br>2014 | CHD<br>mortality | HELGA | 1156 | w | 298              | median<br>2                  | 5-95th<br>percenti<br>le 0-30 | g/day | - | - | - | +follow<br>-up<br>years<br>adjusted<br>per<br>doublin<br>g 0.95 | 0.9-<br>1.0       | 0.95                                 | 0.9-<br>1.01      |   |
|                            |                  |       |      | m | 858              | median<br>2                  | 5-95th<br>percenti<br>le 0-31 |       | - | - | - | 0.98                                                            | 0.95<br>-<br>1.01 | 0.98                                 | 0.95<br>-<br>1.02 |   |

## Supplementary Data

|                                |                                                                                                                            |                    |             |             |                  |               |                                      |   |                          |                   |                   |                            |                   |                   |                   |                                               |
|--------------------------------|----------------------------------------------------------------------------------------------------------------------------|--------------------|-------------|-------------|------------------|---------------|--------------------------------------|---|--------------------------|-------------------|-------------------|----------------------------|-------------------|-------------------|-------------------|-----------------------------------------------|
|                                | fatal stroke                                                                                                               |                    | 280         | w           | 137              | median<br>2   | 5-95th<br>percenti<br>le 0-30        |   | -                        | -                 | -                 | 0.93                       | 0.86<br>-<br>1.01 | 0.93              | 0.86<br>-1.0      |                                               |
|                                |                                                                                                                            |                    |             | m           | 143              | median<br>2   | 5-95th<br>percenti<br>le 0-31        |   | -                        | -                 | -                 | 1.02                       | 0.94<br>-<br>1.10 | 1.02              | 0.94<br>-<br>1.10 |                                               |
| Lyskja<br>er et<br>al,<br>2020 | Probable<br>cases of<br>nonfatal<br>and fatal<br>stroke by<br>linkage to<br>the Danish<br>National<br>Patient<br>Register. | DHC                | 2260        | -           | all<br>5509<br>5 | median<br>5g  | 5-95th<br>percenti<br>le 0.0-<br>150 |   |                          |                   |                   |                            |                   |                   |                   | calendar<br>time,<br>age at<br>enrollme<br>nt |
|                                |                                                                                                                            |                    |             | -           | cases<br>2260    | median<br>0 g | 5-95th<br>percenti<br>le 0.0-<br>50  |   | oatmeal<br>for eggs      |                   |                   | +calend<br>ar time<br>0.94 | 0.92<br>-<br>0.96 | 0.96              | 0.94<br>-<br>0.99 |                                               |
|                                |                                                                                                                            |                    |             |             |                  |               |                                      |   | oatmeal<br>for<br>yogurt |                   |                   | +calend<br>ar time<br>0.97 | 0.95<br>-<br>0.99 | 0.98              | 0.98<br>-<br>1.01 |                                               |
| Xu et<br>al,<br>2019           | heart<br>disease in<br>response to:<br>question<br>"has a<br>doctor ever<br>told you<br>that you<br>have"                  | 45 and Up<br>Study | -           | 45-<br>65 y | -                | -             | -                                    | - | -                        | 0.6<br>8          | 0.61<br>-0.7      | -                          | -                 | 0.83              | 0.75<br>-<br>0.89 | yes                                           |
|                                |                                                                                                                            |                    | -           | 65-<br>80   | -                | -             | -                                    | - | -                        | 0.6<br>9          | 0.63<br>-0.7      | -                          | -                 | 0.79              | 0.73<br>-<br>0.82 |                                               |
|                                |                                                                                                                            |                    | -           | >80y        | -                | -             | -                                    | - | -                        | 0.7<br>5          | 0.67<br>-<br>0.78 | -                          | -                 | 0.76              | 0.66<br>-0.8      |                                               |
|                                | -                                                                                                                          |                    | 45-<br>65 y | -           | -                | -             | -                                    | - | 0.6<br>1                 | 0.5-<br>0.71      | -                 | -                          | 0.72              | 0.57<br>-<br>0.87 |                   |                                               |
|                                | -                                                                                                                          |                    | 65-<br>80   | -           | -                | -             | -                                    | - | 0.6<br>1                 | 0.54<br>-<br>0.67 | -                 | -                          | 0.71              | 0.61<br>-0.8      |                   |                                               |
|                                | -                                                                                                                          |                    | >80y        | -           | -                | -             | -                                    | - | 0.6<br>2                 | 0.53<br>-<br>0.71 | -                 | -                          | 0.58              | 0.47<br>-<br>0.69 |                   |                                               |
|                                |                                                                                                                            |                    |             |             |                  |               |                                      |   |                          |                   |                   |                            |                   |                   |                   |                                               |

## Supplementary Data

|                 |                                                      |                        |     |         |     |   |   |   |   |      |             |   |   |      |             |   |
|-----------------|------------------------------------------------------|------------------------|-----|---------|-----|---|---|---|---|------|-------------|---|---|------|-------------|---|
| Wu et al., 2019 | cardiovascular death, non-fatal MI, non-fatal stroke | The Biosignature study | 175 | oat use | 42  | - | - | - | - | 0.58 | 0,41 - 0,81 | - | - | 0.62 | 0,43 - 0,88 | - |
|                 |                                                      |                        |     | no use  | 133 | - | - | - | - |      |             |   |   |      |             |   |

## B) Categorical exposure

| Author, year        | Outcome definition | Cohort | Total number of events | Group  | Cases by group | Total intake median, (5th-95th percentile) | Age-adjusted model |           | Multivariable analysis |           |
|---------------------|--------------------|--------|------------------------|--------|----------------|--------------------------------------------|--------------------|-----------|------------------------|-----------|
|                     |                    |        |                        |        |                |                                            | HR                 | 95%CI     | HR                     | 95%CI     |
| Juan et al, 2017    | stroke             | HPFS   | 908                    | 424    |                | < 40g/month                                | 1                  |           | 1                      |           |
|                     |                    |        |                        | 246    |                | 40g/month-40g/week                         | 0.92               | 0.78-1.07 | 0.95                   | 0.81-1.11 |
|                     |                    |        |                        | 238    |                | > 40g/week                                 | 0.83               | 0.7-0.97  | 0.9                    | 0.76-1.06 |
|                     |                    | NHS    | 1550                   | 543    |                | < 40g/month                                | 1                  |           | 1                      |           |
|                     |                    |        |                        | 603    |                | 40g/month-40g/week                         | 1.04               | 0.92-1.17 | 1.1                    | 0.97-1.24 |
|                     |                    |        |                        | 404    |                | > 40g/week                                 | 0.98               | 0.86-1.11 | 1.1                    | 0.96-1.26 |
| Hansen et al, 2017  | stroke             | DHC    | 2283                   | -      | 1765           | <21 g/day                                  | 1                  |           | 1                      |           |
|                     |                    |        |                        | -      | 518            | >=21 g/day                                 | 0.76               | 0.69-0.84 | 0.85                   | 0.77-0.95 |
| Johnsen et al, 2014 | CHD mortality      | HELGA  | 298                    | w: CHD | 298            | q 1:0 g/day                                | -                  | -         | 1                      |           |
|                     |                    |        |                        |        |                | q 2:0.4                                    | -                  | -         | 0.74                   | 0.52-1.05 |
|                     |                    |        |                        |        |                | q 3:3                                      | -                  | -         | 0.85                   | 0.59-1.21 |
|                     |                    |        |                        |        |                | q 4:14                                     | -                  | -         | 0.66                   | 0.45-0.96 |
|                     | fatal stroke       |        | 0                      | m: CHD | 418            | q 1:0                                      | -                  | -         | 1                      |           |
|                     |                    |        |                        |        |                | q 2:0.5                                    | -                  | -         | 1.01                   | 0.83-1.23 |
|                     |                    |        |                        |        |                | q 3:4                                      | -                  | -         | 1.01                   | 0.8-1.28  |
|                     |                    |        |                        |        |                | q 4:30                                     | -                  | -         | 0.82                   | 0.65-1.03 |
|                     |                    |        |                        |        | 298            | q 1:0                                      | -                  | -         | 1                      |           |

## Supplementary Data

|  |  |  |  |              |     |         |   |   |      |           |
|--|--|--|--|--------------|-----|---------|---|---|------|-----------|
|  |  |  |  | w:<br>stroke |     | q 2:0.4 | - | - | 1.03 | 0.64-1.67 |
|  |  |  |  |              |     | q 3:3   | - | - | 0.66 | 0.38-1.16 |
|  |  |  |  |              |     | q 4:20  | - | - | 0.63 | 0.34-1.15 |
|  |  |  |  | m:<br>stroke | 418 | q 1:0   | - | - | 1    |           |
|  |  |  |  |              |     | q 2:0.5 | - | - | 0.67 | 0.42-1.07 |
|  |  |  |  |              |     | q 3:5   | - | - | 1.03 | 0.6-1.76  |
|  |  |  |  |              |     | q 4:30  | - | - | 0.71 | 0.41-1.21 |

**Table S4.** Extraction table for all-cause mortality.

|                     |                                  | Category Exposure |                |                     |                                   |                                  |           |                        |           | Continuous exposure |       |                              |                        |           |
|---------------------|----------------------------------|-------------------|----------------|---------------------|-----------------------------------|----------------------------------|-----------|------------------------|-----------|---------------------|-------|------------------------------|------------------------|-----------|
| Author, year        | Cohort                           | sex               | cases by group | Total intake median | Total intake 5th–95th percentiles | Age- and follow up time adjusted |           | Multivariable analysis |           | sex                 | cases | Total intake median in g/day | Multivariable analysis |           |
|                     |                                  |                   |                |                     |                                   | RR                               | 95%CI     | RR                     | 95%CI     |                     |       |                              | HR                     | 95%CI     |
| Johnsen et al, 2014 | HELGA                            | w                 | 3658           | 2                   | 0-30                              | per doubling effect 0.98         | 0.96-0.99 | 0.98                   | 0.96-0.99 | w                   | 3658  | q <sup>1</sup> 1: 0          | 1                      |           |
|                     |                                  | m                 | 4181           | 2                   | 0-31                              | 0.98                             | 0.97-1.0  | 0.98                   | 0.97-1.0  |                     |       | q2: 0.4                      | 0.85                   | 0.78-0.93 |
|                     | Norwegian Women and Cancer Study | w                 |                | 1                   | 0-22                              |                                  |           |                        |           |                     |       | q3: 4                        | 0.74                   | 0.67-0.82 |
|                     | VIP                              | w                 |                | 5                   | 0.3-25                            |                                  |           |                        |           |                     |       | q4: 19                       | 0.78                   | 0.7-0.87  |
|                     |                                  | m                 |                | 5                   | 0.4-31                            |                                  |           |                        |           | m                   | 4181  | q1: 0                        | 1                      |           |
|                     | DHC                              | w                 |                | 1                   | 0-30                              |                                  |           |                        |           |                     |       | q2: 0.4                      | 0.87                   | 0.8-0.95  |
|                     |                                  | m                 | 7839           | 0.9                 | 0-30                              |                                  |           |                        |           |                     |       | q3: 3                        | 0.85                   | 0.77-0.94 |
|                     |                                  |                   |                |                     |                                   |                                  |           |                        |           |                     |       | q4: 30                       | 0.76                   | 0.69-0.85 |

<sup>1</sup> - quartile

## Supplementary Data

**Table S5.** GRADE assessment. Does oat consumption influence the risk of T2D and CVD in the general population.

| Quality assessment              |                            |               |                          |                         |                          |                         |                                                                        | No of study subjects |        | Relative (95% CI) | Quality  | Importance |
|---------------------------------|----------------------------|---------------|--------------------------|-------------------------|--------------------------|-------------------------|------------------------------------------------------------------------|----------------------|--------|-------------------|----------|------------|
|                                 | Design                     | No of studies | Risk of bias             | Inconsistency           | Indirectness             | Imprecision             | Other considerations                                                   | Total                | Events |                   |          |            |
| Outcome 1                       |                            |               |                          |                         |                          |                         |                                                                        |                      |        |                   |          |            |
| T2D (low vs high)               | Observational <sup>1</sup> | 4             | No concern <sup>2</sup>  | No concern <sup>3</sup> | No concern <sup>4</sup>  | No concern <sup>5</sup> | No evident publication bias <sup>6</sup> ; no upgrading <sup>7</sup>   | 250249               | 26046  | 0.78 (0.74-0.82)  | low      | Critical   |
| Outcome 2                       |                            |               |                          |                         |                          |                         |                                                                        |                      |        |                   |          |            |
| T2D (consumer vs. non consumer) | Observational <sup>1</sup> | 3             | -1 <sup>8</sup>          | -1 <sup>9</sup>         | No concern <sup>10</sup> | -1 <sup>11</sup>        | No evident publication bias <sup>12</sup> ; no upgrading <sup>13</sup> | 273489               | 14579  | 0.86 (0.72-1.03)  | very low | Critical   |
| Outcome 3                       |                            |               |                          |                         |                          |                         |                                                                        |                      |        |                   |          |            |
| CHD and MI                      | Observational <sup>1</sup> | 2             | -1 <sup>14</sup>         | -1 <sup>15</sup>        | No concern <sup>16</sup> | -1 <sup>17</sup>        | No evident publication bias <sup>18</sup> ; no upgrading <sup>19</sup> | 197374               | 16477  | 0.81 (0.61-1.08)  | very low | Critical   |
| Outcome 4                       |                            |               |                          |                         |                          |                         |                                                                        |                      |        |                   |          |            |
| Stroke                          | Observational <sup>1</sup> | 4             | No concern <sup>20</sup> | -1 <sup>21</sup>        | No concern <sup>22</sup> | -1 <sup>23</sup>        | No evident publication bias <sup>6</sup> ; no upgrading <sup>24</sup>  | 312171               | 7629   | 0.79 (0.59-1.07)  | very low | Critical   |
| Outcome 5                       |                            |               |                          |                         |                          |                         |                                                                        |                      |        |                   |          |            |
| Composite CVD                   | Observational <sup>1</sup> | 2             | -1 <sup>25</sup>         | -1 <sup>26</sup>        | No concern <sup>27</sup> | -1 <sup>28</sup>        | No evident publication bias <sup>18</sup> ; no upgrading <sup>29</sup> | 121181               | 1611   | 0.73 (0.5-1.07)   | very low | Critical   |

# Oat intake and risk of type 2 diabetes, cardiovascular disease and all-cause mortality: a systemic review and meta-analysis. Wehrli F

## Supplementary Data

<sup>1</sup> All the studies were prospective cohort studies

<sup>2</sup> All the studies are of high quality, so we do not think bias is a concern in this outcome.

<sup>3</sup>  $I^2 = 47\%$  (moderate heterogeneity),  $p = 0.129$ ; no wide variation of point estimate across studies; confidence intervals are mostly overlapping

<sup>4</sup> Two studies included only women, one study included only men, one study included men and women; three studies from North America, one study is from Europe. The study results can be generalized to the general population.

<sup>5</sup> Large number of participants, including cases with T2D (250,249, therefrom 26,046 T2D cases); effect size statistically significant (95% CI does not include 1).

<sup>6</sup> Due to a small number of studies ( $n=4$ ), publication bias was not formally assessed.

<sup>7</sup> No upgrade due to small effect size, accounted for confounders (age, smoking, alcohol intake, postmenopausal hormone use), however, other important confounders were not taken into account (residual confounding); no evidence for dose-response relationship.

<sup>8</sup> Assessed by Newcastle-Ottawa Scale one study was of good quality, two of fair quality, therefore bias is a concern in this outcome.

<sup>9</sup> High heterogeneity:  $I^2 = 97.6\%$ ,  $p=0.000$  (considerate heterogeneity); point estimates demonstrate high variability, one study has no overlap of 95% CI with others.

<sup>10</sup> One study was conducted in Northern America, one in Europe, one in Australia, therefore we think the results can be generalized to the general population.

<sup>11</sup> Large number of participants, including cases with T2D (273,489, therefrom 14,579 T2D cases); effect size is not statistically significant (95% CI includes 1).

<sup>12</sup> Due to a small number of studies ( $n=3$ ), publication bias was not formally assessed.

<sup>13</sup> No upgrade due to small effect size, accounted for confounders (alcohol intake, smoking), however, other important confounders were not taken into account (residual confounding); no evidence for dose-response relationship.

<sup>14</sup> Assessed by Newcastle-Ottawa Scale one study was of good quality, one of fair quality, therefore, bias is a concern in this outcome.

<sup>15</sup>  $I^2 = 99.2\%$ ,  $p=0.000$  (considerate heterogeneity); point estimates demonstrate high variability; 95% confidence intervals do not overlap.

<sup>16</sup> One study conducted in Europe and one from Australia, the study results can be generalized to the general population, both sexes were assessed, no difference between genders, when reported separately.

<sup>17</sup> Large number of participants, including cases with CHD and MI (197,374, therefrom 16,477 CHD and MI cases); effect size is not statistically significant (95% CI includes 1).

<sup>18</sup> Due to a small number of studies ( $n=2$ ), publication bias was not formally assessed.

<sup>19</sup> No upgrade due to small effect size, accounted for confounders (educational status, smoking, alcohol intake, physical activity, fruit and meat intake), however, other important confounders were not taken into account (residual confounding); no evidence for dose-response relationship.

<sup>20</sup> Assessed by Newcastle-Ottawa Scale three studies out of four were of fair quality, one of good quality, therefore we not think bias is a concern in this outcome.

<sup>21</sup> High heterogeneity:  $I^2 = 97.2\%$ ,  $p=0.000$  (considerate heterogeneity); point estimates demonstrate high variability, one study has no overlap of 95% CI with others.

<sup>22</sup> Two studies were conducted in Northern America, one in Europe and one in Australia, therefore we think the results can be generalized to the general population.

<sup>23</sup> Large number of participants, including cases with stroke (197,374, therefrom 7,629 stroke cases); effect size is not statistically significant (95% CI includes 1).

<sup>24</sup> No upgrade due to small effect size, accounted for confounders (BMI, physical activity, alcohol intake, smoking), however, other important confounders were not taken into account (residual confounding); no evidence for dose-response relationship.

<sup>25</sup> Assessed by Newcastle-Ottawa Scale both studies were of fair quality, therefore, bias is a concern in this outcome.

<sup>26</sup>  $I^2 = 79.1\%$ ,  $p=0.029$  (considerate heterogeneity); point estimates demonstrate high variability; 95% confidence intervals barely overlap.

<sup>27</sup> One study conducted in Europe and one is from Taiwan, the study results can be generalized to the general population, both sexes were assessed, no difference between genders, when reported separately.

<sup>28</sup> Large number of participants, including cases with CVD (121,181, therefrom 1,611 CVD cases); effect size is not statistically significant (95% CI includes 1).

Oat intake and risk of type 2 diabetes, cardiovascular disease and all-cause mortality: a systemic review and meta-analysis. Wehrli F

#### Supplementary Data

<sup>29</sup> No upgrade due to small effect size, accounted for confounders (age and smoking), however, other important confounders were not taken into account (residual confounding); no evidence for dose-response relationship.
